# Supplementary material for: Latent Bacterial Cells Residing Inside Macrophages Can Be Spotted With pH-sensitive Fluorescent FRET Probe in Polymeric Micellar Formulation
Source: Preprints.org preprint supplement (doi:10.20944/preprints202408.0285.v1), 2024-08-06

Latent Bacterial Cells Residing Inside Macrophages Can Be Spotted With pH-sensitive Fluorescent FRET Probe in Poly-meric Micellar Formulation

Igor D. Zlotnikov 1, Alexander A. Ezhov 2, Natalya G. Belogurova 1 and Elena V. Kudryashova 1,*

1 Faculty of Chemistry, Lomonosov Moscow State University, Leninskie Gory, 1/3, 119991 Moscow, Russia; zlotnikovid@my.msu.ru, nbelog@mail.ru (N.G.B.)

2 Faculty of Physics, Lomonosov Moscow State University, Leninskie Gory, 1/2, 119991 Moscow, Russia;
alexander-ezhov@yandex.ru (A.A.E.)

***** Correspondence: helena_koudriachova@hotmail.com (E.V.K.)

**Figure S1.** Synthesis scheme of the pH-sensitive fluorophore NBD-spd-R6G. The products are a mixture of isomers (because spermidine is not symmetrical).


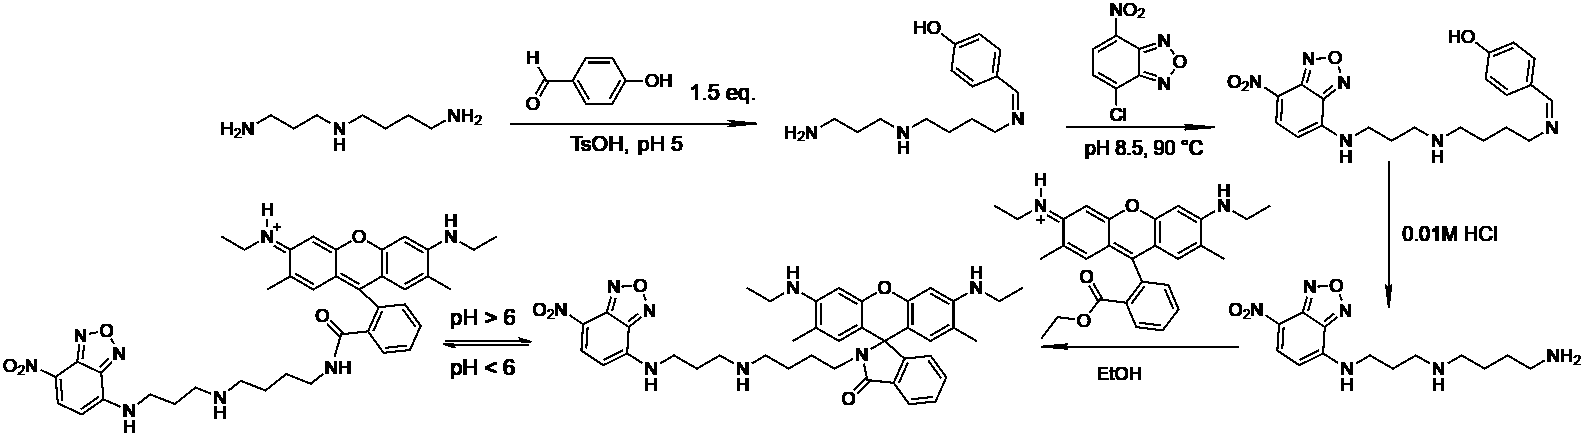


**Figure S2.** FTIR spectra of initial compounds, intermediate substances, and product of synthesis of pH-sensitive fluorophore R6G-spd-NBD: (**a**) stage 1, (**b**) stage 2, (**c**) stage 3, (**d**) stage 4. Aqueous solutions. T = 22 °C.

|  |
| --- |
| (**a**) |
| **** |
| (**b**) |
| 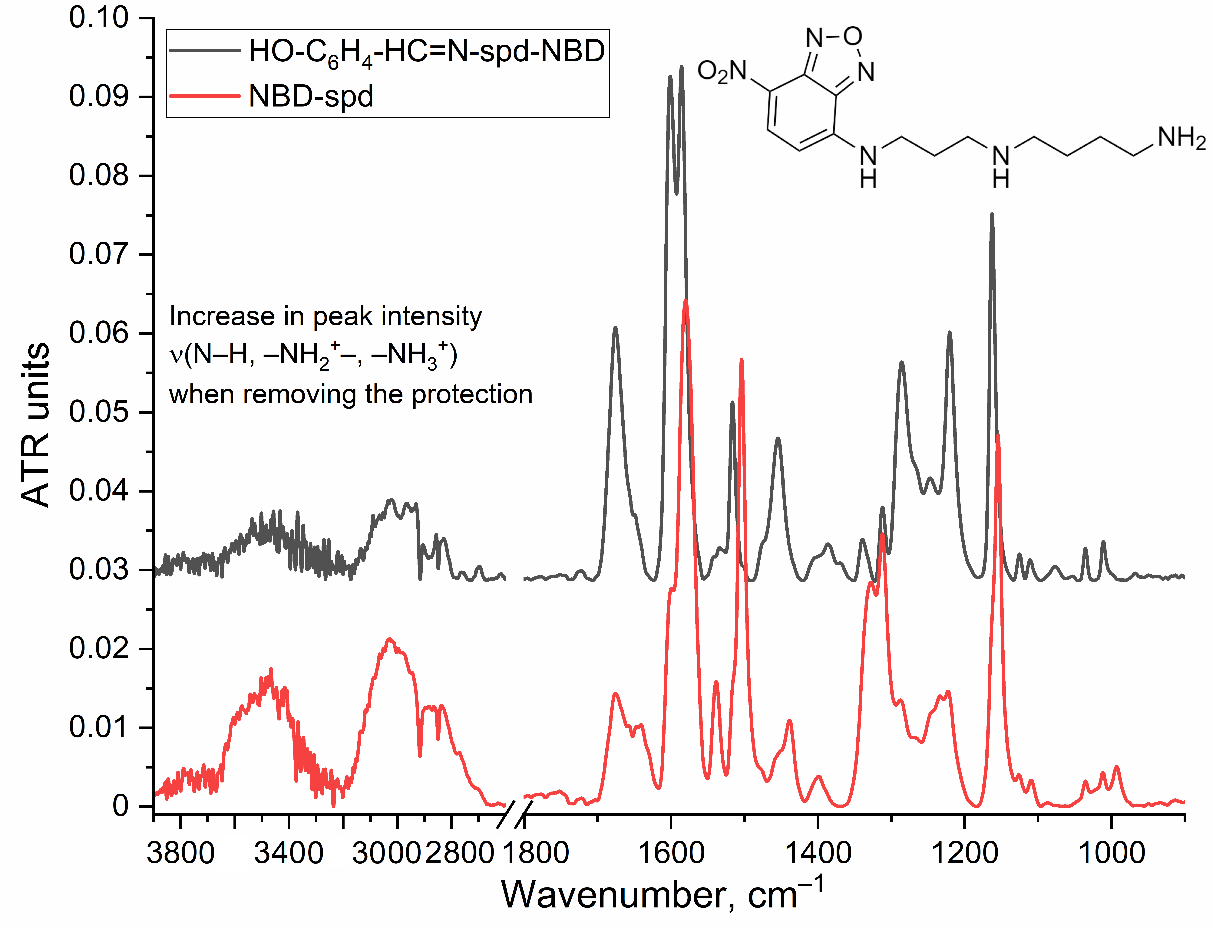 |
| (**c**) |
|  |
| (**d**) |

**Figure S3.** 1H NMR spectra of NBD-spd. T = 22 °C. DMSO-d6, 500 MHz.


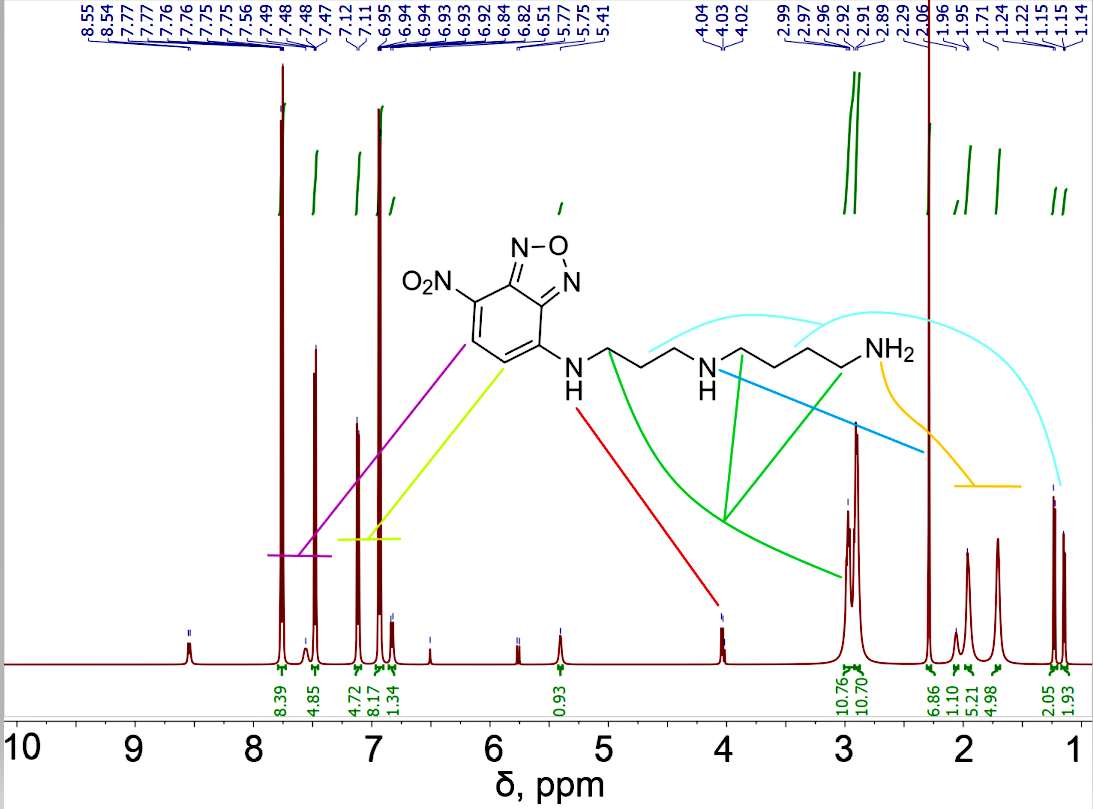


**Figure 6**. Confocal laser scanning microscopy images of HEK293T normal cells labeled with R6G or R6G-spd-NBD (1 µg/mL for all markers). λexci = 488 nm, λemi = 510–560 nm (green), λemi = 560–800 nm (red). The green and red channels are shown, as well as a brightfield and merge. The scale segment is 60 µm. “Micelles” means Chit5-LA polymeric micelles. Cmic = 0.1 mg/mL.


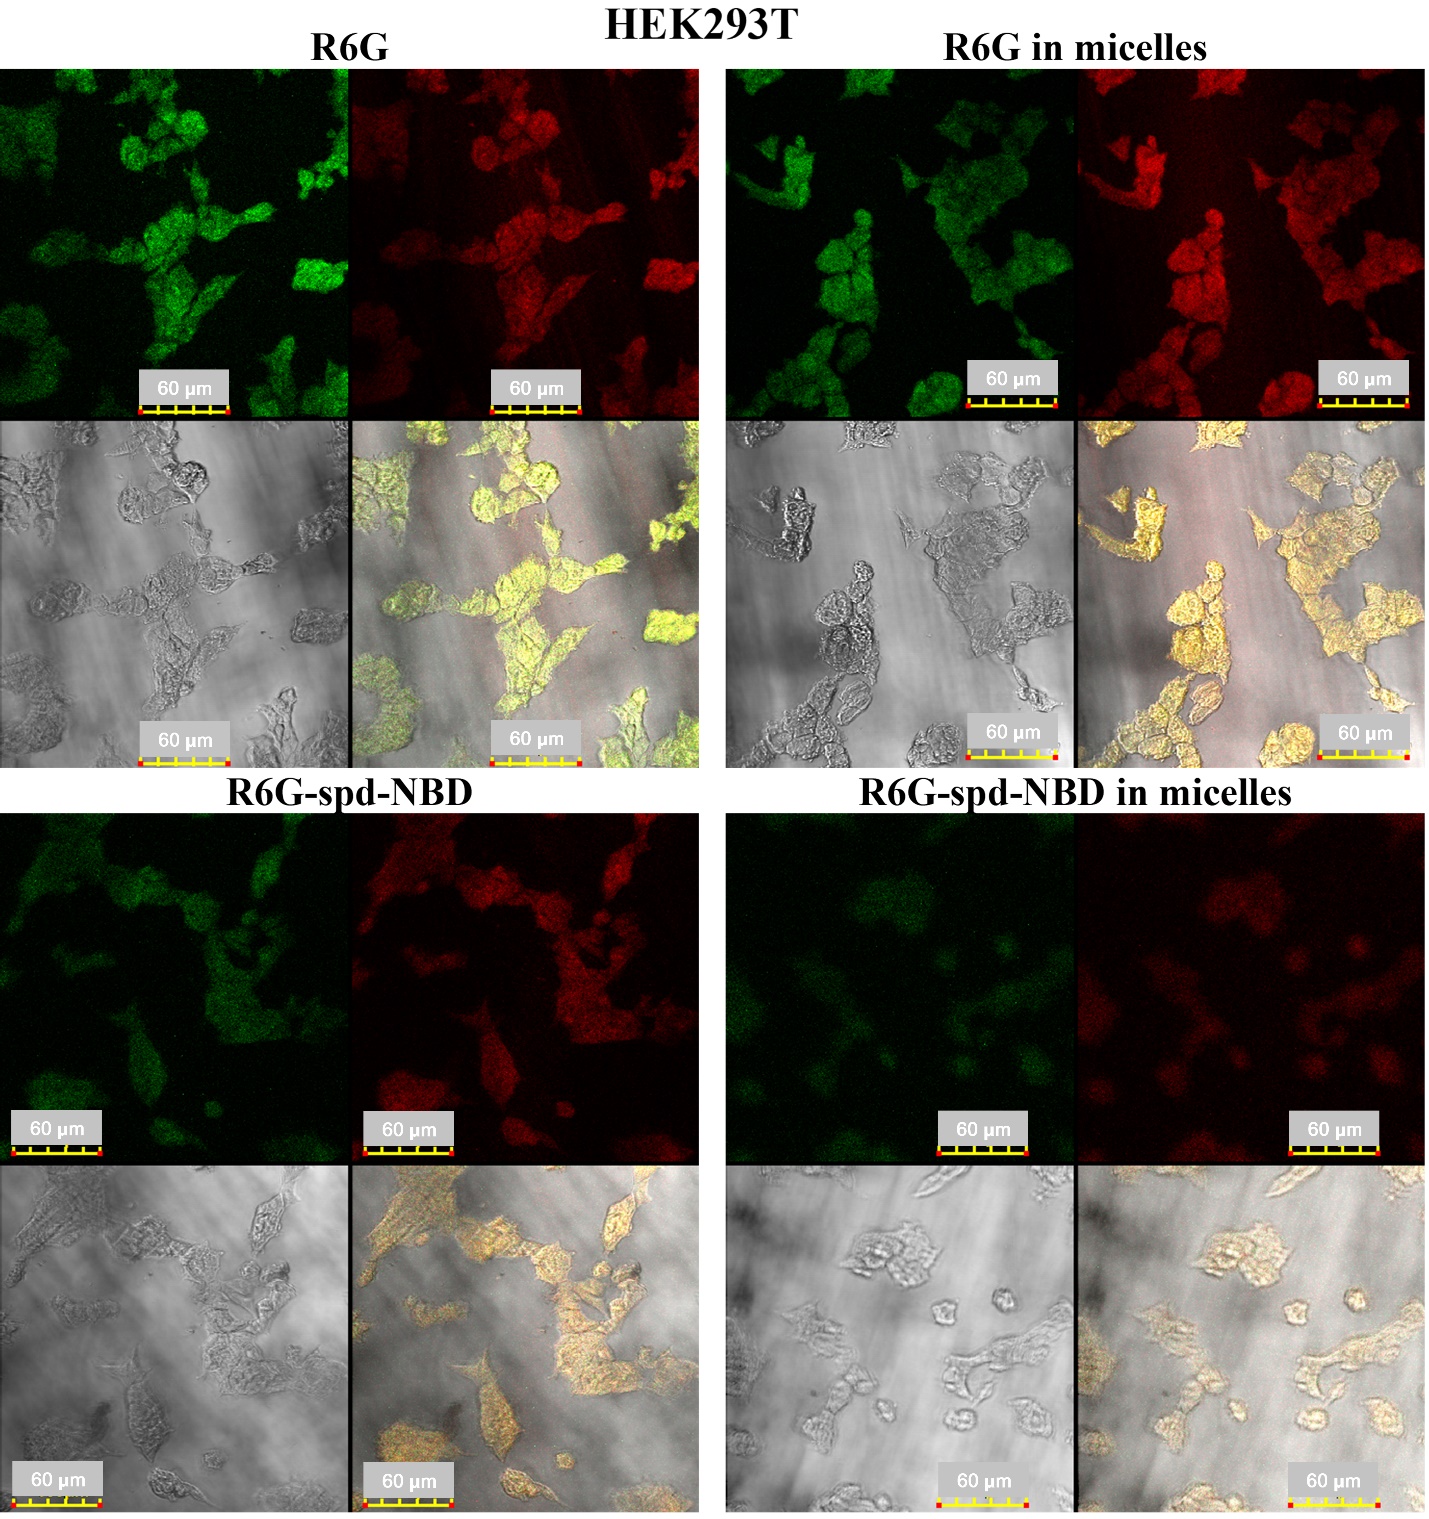

Supplement: Supplementary file 1 [file supplementary]
